# Supplementary material for: Transcriptome Modifications in Porcine Adipocytes via Toll-Like Receptors Activation
Source: Front Immunol. 2019 May 29;10:1180. doi: 10.3389/fimmu.2019.01180 (PMC6549529; doi:10.3389/fimmu.2019.01180)
Supplement: Supplementary Table S5 — Centrality estimates of protein interaction network of TLR ligand-induced DEGs in adipocytes obtained from NetworkAnalyst (.xlxs). [file Table_5.XLSX]

## Sheet: Degree-betweennees_PPI
InnateDB ID_Node	Label_Node	Degree	Betweenness
Q04206	RELA	7	129.74
P41235	HNF4A	6	109.92
P19235	EPOR	5	145.03
P08047	SP1	4	83.09
P01024	C3	4	77.12
P49675	STAR	4	70.63
P13500	CCL2	4	70.01
P0DJI9	SAA2	3	61.23
P49715	CEBPA	3	30.16
P17676	CEBPB	3	22.24
P29460	IL12B	3	17.96
P16422	EPCAM	2	43.12
P42229	STAT5A	2	33
P53779	MAPK10	2	25.4
P21580	TNFAIP3	2	25.4
P78329	CYP4F2	2	22.87
P16220	CREB1	2	21.45
Q15848	ADIPOQ	2	21.08
P13569	CFTR	2	19.15
P00740	F9	2	12.69
P04179	SOD2	2	11.29
Q9NZN1	IL1RAPL1	2	9.17
Q06124	PTPN11	2	8.54
P27986	PIK3R1	2	8.54
P16581	SELE	2	8
P19875	CXCL2	2	8
P40337	VHL	2	2.55
P32246	CCR1	2	0
P80075	CCL8	2	0
P15248	IL9	1	0
Q9UNU6	CYP8B1	1	0
Q14627	IL13RA2	1	0
P17787	CHRNB2	1	0
P00751	CFB	1	0
