# Supplementary material for: Transcriptome Modifications in Porcine Adipocytes via Toll-Like Receptors Activation
Source: Front Immunol. 2019 May 29;10:1180. doi: 10.3389/fimmu.2019.01180 (PMC6549529; doi:10.3389/fimmu.2019.01180)
Supplement: Supplementary Table S6 — Centrality estimates of Gene-transcription factor interaction network of TLR ligand-induced DEGs in adipocytes obtained from NetworkAnalyst (.xlxs). [file Table_6.XLSX]

## Sheet: Supplementary file for TF-Gene-
ID_Node	Label_Node	Degree	Betweenness
2624	GATA2	12	154.81
2296	FOXC1	10	114.29
5602	MAPK10	8	62.5
6401	SELE	7	57.25
7392	USF2	7	53.14
4072	EPCAM	6	53.29
718	C3	6	50.85
3725	JUN	6	43.08
629	CFB	6	39.67
7128	TNFAIP3	6	32.54
5468	PPARG	6	26.98
1582	CYP8B1	5	32.04
4790	NFKB1	5	28.47
2920	CXCL2	5	28.14
9370	ADIPOQ	5	27.31
4782	NFIC	5	26.92
6289	SAA2	5	26.51
7003	TEAD1	5	16.24
2300	FOXL1	5	15.76
2099	ESR1	4	41.09
8529	CYP4F2	4	23.53
6648	SOD2	4	22.58
53833	IL20RB	4	21.42
10803	CCR9	4	16.17
2625	GATA3	4	14.89
3578	IL9	4	14.36
5970	RELA	4	13.29
7528	YY1	4	12.02
6772	STAT1	4	11.26
1385	CREB1	4	9.14
6347	CCL2	3	11.07
8626	TP63	3	9.63
3593	IL12B	3	9.15
639	PRDM1	3	8.14
6447	SCG5	3	8.05
2057	EPOR	3	5.77
4800	NFYA	3	3.85
1230	CCR1	2	3.79
6770	STAR	1	0
